# Supplementary material for: ROR1 is a novel putative druggable target for diffuse glioma
Source: bioRxiv or medRxiv preprint supplement (doi:10.1101/2021.12.03.21267166), 2021-12-05
Supplement: Supplementary file [file media-2.pdf]

## Supplementary Information Appendix 2 for

### ROR1 is a novel putative druggable target for diffuse glioma

Miya John<sup>a</sup>, Padmashree Rao<sup>b</sup>, Humaira Noor<sup>c</sup> and Caroline Ford<sup>a</sup>

<sup>a</sup> Gynaecological Cancer Research Group, Lowy Cancer Research Centre, School of Women's and Children's Health, Faculty of Medicine and Health, University of New South Wales, Sydney, New South Wales 2052, Australia

<sup>b</sup> Children's Cancer Institute, University of New South Wales, Sydney, NSW 2031, Australia.

<sup>c</sup> Cure Brain Cancer Biomarkers and Translational Research Group, Prince of Wales Clinical School, University of New South Wales, Sydney, NSW 2031, Australia

Corresponding authors: Miya John and Caroline Ford.

Email: miya.john@unsw.edu.au and caroline.ford@unsw.edu.au"

#### TCGA Abbreviations:

ACC (adrenocortical carcinoma), BLCA (bladder urothelial carcinoma), BRCA (breast invasive carcinoma), CESC (cervical squamous cell carcinoma and endocervical adenocarcinoma), CHOL (cholangiocarcinoma), COAD (colon adenocarcinoma), DLBC (lymphoid neoplasm diffuse large B-cell lymphoma), ESCA (esophageal carcinoma), GBM (glioblastoma multiforme), HNSC (head and neck squamous cell carcinoma), KICH (kidney chromophobe), KIRC (kidney renal clear cell carcinoma), KIRP (kidney renal papillary cell carcinoma), LAML (acute myeloid leukemia), LGG (brain lower grade glioma), LIHC (liver hepatocellular carcinoma), LUAD (lung adenocarcinoma), LUSC (lung squamous cell carcinoma), MESO (mesothelioma), OV (ovarian serous cystadenocarcinoma), PAAD (pancreatic adenocarcinoma), PCPG (pheochromocytoma and paraganglioma), PRAD (prostate adenocarcinoma), READ (rectum adenocarcinoma), SARC (sarcoma), SKCM (skin cutaneous melanoma), STAD (stomach adenocarcinoma), TGCT (testicular germ cell tumours), THCA (thyroid carcinoma), THYM (thymoma), UCEC (uterine corpus endometrial carcinoma), UCS (uterine carcinosarcoma) and UVM (uveal melanoma).

#### Multivariate Analysis

##### ROR1 in ACC (n=79):

Model: Surv(OS, EVENT) ~ `ROR1` + Age + Gender + Race

68 patients with 26 dying ( 11 missing obs. )

|            | coef   | HR          | se(coef) | 95%CI_l | 95%CI_u | z     | p     | signif |
|------------|--------|-------------|----------|---------|---------|-------|-------|--------|
| ROR1       | 0.542  | 1.72        | 0.454    | 0.706   | 4.189   | 1.194 | 0.233 |        |
| Age        | 0.005  | 1.005       | 0.014    | 0.978   | 1.032   | 0.342 | 0.732 |        |
| Gendermale | 0.055  | 1.056       | 0.401    | 0.481   | 2.318   | 0.136 | 0.891 |        |
| RaceBlack  | 1.421  | 4.143       | 11699.01 | 0       | Inf     | 0     | 1     | <NA>   |
| RaceWhite  | 18.409 | 98814492.01 | 10046.1  | 0       | Inf     | 0.002 | 0.999 |        |

Rsquare = 0.051 (max possible = 9.43e-01 )

Likelihood ratio test p = 6.17e-01

Wald test p = 9.16e-01

Score (logrank) test p = 7.44e-01

##### ROR1 in BLCA (n=408):

Model: Surv(OS, EVENT) ~ `ROR1` + Age + Gender + Race + Stage

385 patients with 169 dying ( 23 missing obs. )

|            | coef   | HR          | se(coef) | 95%CI_l | 95%CI_u | z      | p     | signif |
|------------|--------|-------------|----------|---------|---------|--------|-------|--------|
| ROR1       | 0.196  | 1.216       | 0.146    | 0.913   | 1.62    | 1.338  | 0.181 |        |
| Age        | 0.033  | 1.033       | 0.008    | 1.017   | 1.05    | 3.962  | 0     | ***    |
| Gendermale | -0.156 | 0.855       | 0.173    | 0.609   | 1.201   | -0.903 | 0.367 |        |
| RaceBlack  | 0.509  | 1.664       | 0.438    | 0.706   | 3.923   | 1.163  | 0.245 |        |
| RaceWhite  | 0.036  | 1.037       | 0.354    | 0.518   | 2.076   | 0.102  | 0.919 |        |
| Stage2     | 14.467 | 1918663.287 | 1918.804 | 0       | Inf     | 0.008  | 0.994 |        |
| Stage3     | 14.872 | 2875091.382 | 1918.804 | 0       | Inf     | 0.008  | 0.994 |        |
| Stage4     | 15.423 | 4990663.309 | 1918.804 | 0       | Inf     | 0.008  | 0.994 |        |

Rsquare = 0.122 (max possible = 9.9e-01 )

Likelihood ratio test p = 4.19e-08

Wald test p = 2.13e-07

Score (logrank) test p = 5.67e-08

##### ROR1 in BRCA (n=1100):

Model: Surv(OS, EVENT) ~ `ROR1` + Age + Gender + Race + Stage

976 patients with 136 dying ( 124 missing obs. )

|  | coef | HR | se(coef) | 95%CI_l | 95%CI_u | z | p | signif |
|--|------|----|----------|---------|---------|---|---|--------|
|--|------|----|----------|---------|---------|---|---|--------|

|            |        |        |       |       |        |        |       |     |
|------------|--------|--------|-------|-------|--------|--------|-------|-----|
| ROR1       | 0.191  | 1.211  | 0.103 | 0.989 | 1.482  | 1.855  | 0.064 | .   |
| Age        | 0.035  | 1.036  | 0.007 | 1.022 | 1.05   | 5.018  | 0     | *** |
| Gendermale | -0.516 | 0.597  | 1.012 | 0.082 | 4.337  | -0.51  | 0.61  |     |
| RaceBlack  | 0.126  | 1.134  | 0.616 | 0.339 | 3.789  | 0.204  | 0.838 |     |
| RaceWhite  | -0.176 | 0.838  | 0.595 | 0.261 | 2.69   | -0.297 | 0.767 |     |
| Stage2     | 0.579  | 1.785  | 0.281 | 1.029 | 3.096  | 2.062  | 0.039 | *   |
| Stage3     | 1.244  | 3.471  | 0.296 | 1.942 | 6.205  | 4.198  | 0     | *** |
| Stage4     | 2.697  | 14.834 | 0.38  | 7.045 | 31.233 | 7.099  | 0     | *** |

Rsquare = 0.075 (max possible = 7.93e-01 )

Likelihood ratio test p = 3.43e-13

Wald test p = 6.74e-17

Score (logrank) test p = 6.65e-23

#### ROR1 in BRCA-Basal (n=191):

Model: Surv(OS, EVENT) ~ `ROR1` + Age + Race + Stage

177 patients with 26 dying ( 14 missing obs. )

|           | coef   | HR       | se(coef) | 95%CI_l | 95%CI_u | z      | p     | signif |
|-----------|--------|----------|----------|---------|---------|--------|-------|--------|
| ROR1      | -0.085 | 9.18E-01 | 0.208    | 0.61    | 1.382   | -0.409 | 0.683 |        |
| Age       | 0.007  | 1.01E+00 | 0.017    | 0.975   | 1.041   | 0.437  | 0.662 |        |
| RaceBlack | -1.026 | 3.58E-01 | 1.084    | 0.043   | 3.001   | -0.946 | 0.344 |        |
| RaceWhite | -1.537 | 2.15E-01 | 1.124    | 0.024   | 1.946   | -1.368 | 0.171 |        |
| Stage2    | 18.845 | 1.53E+08 | 6162.592 | 0       | Inf     | 0.003  | 0.998 |        |
| Stage3    | 20.225 | 6.08E+08 | 6162.592 | 0       | Inf     | 0.003  | 0.997 |        |
| Stage4    | 21.167 | 1.56E+09 | 6162.592 | 0       | Inf     | 0.003  | 0.997 |        |

Rsquare = 0.153 (max possible = 7.23e-01 )

Likelihood ratio test p = 1.22e-04

Wald test p = 3.22e-03

Score (logrank) test p = 8.56e-07

#### ROR1 in BRCA-Her2 (n=82):

Model: Surv(OS, EVENT) ~ `ROR1` + Age + Race + Stage

66 patients with 13 dying ( 16 missing obs. )

|           | coef   | HR    | se(coef) | 95%CI_l | 95%CI_u | z      | p     | signif |
|-----------|--------|-------|----------|---------|---------|--------|-------|--------|
| ROR1      | -0.113 | 0.893 | 0.667    | 0.242   | 3.3     | -0.17  | 0.865 |        |
| Age       | 0.048  | 1.049 | 0.03     | 0.989   | 1.113   | 1.59   | 0.112 |        |
| RaceBlack | -2.902 | 0.055 | 1.745    | 0.002   | 1.679   | -1.663 | 0.096 | .      |
| RaceWhite | -1.511 | 0.221 | 1.438    | 0.013   | 3.692   | -1.051 | 0.293 |        |
| Stage2    | -0.431 | 0.65  | 1.154    | 0.068   | 6.242   | -0.374 | 0.709 |        |
| Stage3    | 0.674  | 1.961 | 1.204    | 0.185   | 20.769  | 0.559  | 0.576 |        |
| Stage4    | NA     | NA    | 0        | NA      | NA      | NA     | NA    | <NA>   |

Rsquare = 0.326 (max possible = 7.08e-01 )

Likelihood ratio test p = 2.22e-04

Wald test p = 1.14e-01

Score (logrank) test p = 6.28e-17

#### ROR1 in BRCA-LumA (n=568):

Model: Surv(OS, EVENT) ~ `ROR1` + Age + Gender + Race + Stage

513 patients with 59 dying ( 55 missing obs. )

|            | coef    | HR     | se(coef) | 95%CI_l | 95%CI_u | z      | p     | signif |
|------------|---------|--------|----------|---------|---------|--------|-------|--------|
| ROR1       | 0.355   | 1.426  | 0.17     | 1.022   | 1.991   | 2.088  | 0.037 | *      |
| Age        | 0.047   | 1.048  | 0.011    | 1.026   | 1.071   | 4.342  | 0     | ***    |
| Gendermale | -15.492 | 0      | 3837.774 | 0       | Inf     | -0.004 | 0.997 |        |
| RaceBlack  | -0.246  | 0.782  | 1.173    | 0.078   | 7.793   | -0.21  | 0.834 |        |
| RaceWhite  | 0.222   | 1.248  | 1.028    | 0.166   | 9.365   | 0.215  | 0.829 |        |
| Stage2     | 0.458   | 1.581  | 0.363    | 0.776   | 3.224   | 1.261  | 0.207 |        |
| Stage3     | 0.873   | 2.394  | 0.393    | 1.108   | 5.174   | 2.22   | 0.026 | *      |
| Stage4     | 2.411   | 11.149 | 0.592    | 3.494   | 35.571  | 4.074  | 0     | ***    |

Rsquare = 0.069 (max possible = 6.74e-01 )

Likelihood ratio test p = 1.35e-05

Wald test p = 1.13e-06

Score (logrank) test p = 1.29e-08

#### ROR1 in BRCA-LumB (n=219):

Model: Surv(OS, EVENT) ~ `ROR1` + Age + Gender + Race + Stage

181 patients with 31 dying ( 38 missing obs. )

|            | coef   | HR          | se(coef) | 95%CI_l | 95%CI_u | z      | p     | signif |
|------------|--------|-------------|----------|---------|---------|--------|-------|--------|
| ROR1       | 0.227  | 1.254       | 0.339    | 0.645   | 2.439   | 0.668  | 0.504 |        |
| Age        | 0.034  | 1.035       | 0.016    | 1.002   | 1.069   | 2.068  | 0.039 | *      |
| Gendermale | -0.337 | 0.714       | 1.069    | 0.088   | 5.803   | -0.316 | 0.752 |        |
| RaceBlack  | 16.305 | 12051610.07 | 4995.883 | 0       | Inf     | 0.003  | 0.997 |        |
| RaceWhite  | 15.822 | 7439054.81  | 4995.883 | 0       | Inf     | 0.003  | 0.997 |        |
| Stage2     | 1.178  | 3.247       | 0.801    | 0.675   | 15.609  | 1.47   | 0.142 |        |
| Stage3     | 1.773  | 5.888       | 0.819    | 1.182   | 29.339  | 2.164  | 0.03  | *      |
| Stage4     | 2.557  | 12.9        | 0.963    | 1.952   | 85.239  | 2.654  | 0.008 | **     |

Rsquare = 0.081 (max possible = 7.35e-01 )

Likelihood ratio test p = 5.29e-02

Wald test p = 8.47e-02

Score (logrank) test p = 3.43e-02

#### ROR1 in CESC (n=306):

Model: Surv(OS, EVENT) ~ `ROR1` + Age + Race

255 patients with 63 dying ( 51 missing obs. )

|           | coef  | HR    | se(coef) | 95%CI_l | 95%CI_u | z     | p     | signif |
|-----------|-------|-------|----------|---------|---------|-------|-------|--------|
| ROR1      | 0.69  | 1.993 | 0.224    | 1.284   | 3.092   | 3.077 | 0.002 | **     |
| Age       | 0.02  | 1.02  | 0.009    | 1.001   | 1.039   | 2.096 | 0.036 | *      |
| RaceBlack | 0.54  | 1.716 | 0.801    | 0.357   | 8.243   | 0.674 | 0.5   |        |
| RaceWhite | 0.525 | 1.69  | 0.725    | 0.408   | 7.004   | 0.724 | 0.469 |        |

Rsquare = 0.047 (max possible = 9.02e-01 )

Likelihood ratio test p = 1.61e-02

Wald test p = 7.51e-03

Score (logrank) test p = 6.62e-03

#### ROR1 in CHOL (n=36):

Model: Surv(OS, EVENT) ~ `ROR1` + Age + Gender + Race + Stage

36 patients with 18 dying ( 0 missing obs. )

|            | coef    | HR    | se(coef) | 95%CI_l | 95%CI_u | z      | p     | signif |
|------------|---------|-------|----------|---------|---------|--------|-------|--------|
| ROR1       | -0.298  | 0.742 | 0.28     | 0.429   | 1.285   | -1.064 | 0.287 |        |
| Age        | 0.017   | 1.017 | 0.023    | 0.972   | 1.064   | 0.733  | 0.464 |        |
| Gendermale | 0.172   | 1.188 | 0.557    | 0.399   | 3.537   | 0.31   | 0.757 |        |
| RaceBlack  | 0.52    | 1.683 | 1.506    | 0.088   | 32.23   | 0.345  | 0.73  |        |
| RaceWhite  | -0.583  | 0.558 | 0.936    | 0.089   | 3.491   | -0.624 | 0.533 |        |
| Stage2     | 0.892   | 2.44  | 0.697    | 0.622   | 9.572   | 1.279  | 0.201 |        |
| Stage3     | -17.197 | 0     | 6920.755 | 0       | Inf     | -0.002 | 0.998 |        |
| Stage4     | 0.938   | 2.556 | 0.658    | 0.704   | 9.275   | 1.427  | 0.154 |        |

Rsquare = 0.198 (max possible = 9.46e-01 )

Likelihood ratio test p = 4.4e-01

Wald test p = 6.18e-01

Score (logrank) test p = 4.51e-01

#### ROR1 in COAD (n=458):

Model: Surv(OS, EVENT) ~ `ROR1` + Age + Gender + Race + Stage

268 patients with 64 dying ( 190 missing obs. )

|            | coef   | HR    | se(coef) | 95%CI_l | 95%CI_u | z      | p     | signif |
|------------|--------|-------|----------|---------|---------|--------|-------|--------|
| ROR1       | 0.26   | 1.297 | 0.247    | 0.799   | 2.107   | 1.052  | 0.293 |        |
| Age        | 0.029  | 1.029 | 0.011    | 1.007   | 1.052   | 2.537  | 0.011 | *      |
| Gendermale | 0.173  | 1.189 | 0.268    | 0.702   | 2.012   | 0.644  | 0.52  |        |
| RaceBlack  | -0.451 | 0.637 | 0.808    | 0.131   | 3.104   | -0.558 | 0.577 |        |
| RaceWhite  | -0.573 | 0.564 | 0.758    | 0.128   | 2.492   | -0.755 | 0.45  |        |
| Stage2     | 0.195  | 1.216 | 0.562    | 0.404   | 3.66    | 0.348  | 0.728 |        |
| Stage3     | 0.802  | 2.23  | 0.55     | 0.76    | 6.547   | 1.459  | 0.144 |        |
| Stage4     | 1.927  | 6.871 | 0.556    | 2.309   | 20.448  | 3.464  | 0.001 | **     |

Rsquare = 0.112 (max possible = 8.99e-01 )

Likelihood ratio test p = 9.51e-05

Wald test p = 4.19e-05

Score (logrank) test p = 6.4e-06

#### ROR1 in DLBC (n=48):

Model: Surv(OS, EVENT) ~ `ROR1` + Age + Gender + Race

47 patients with 9 dying ( 1 missing obs. )

|  | coef | HR | se(coef) | 95%CI_l | 95%CI_u | z | p | signif |
|--|------|----|----------|---------|---------|---|---|--------|
|--|------|----|----------|---------|---------|---|---|--------|

|            |        |       |       |       |        |        |       |   |
|------------|--------|-------|-------|-------|--------|--------|-------|---|
| ROR1       | -0.403 | 0.668 | 1.289 | 0.053 | 8.367  | -0.312 | 0.755 |   |
| Age        | -0.002 | 0.998 | 0.031 | 0.94  | 1.06   | -0.063 | 0.95  |   |
| Gendermale | 0.452  | 1.572 | 0.8   | 0.328 | 7.54   | 0.565  | 0.572 |   |
| RaceBlack  | 1.01   | 2.747 | 1.277 | 0.225 | 33.529 | 0.792  | 0.429 |   |
| RaceWhite  | -1.534 | 0.216 | 0.926 | 0.035 | 1.325  | -1.656 | 0.098 | . |

Rsquare = 0.102 (max possible = 6.72e-01 )

Likelihood ratio test p = 4.07e-01

Wald test p = 4.43e-01

Score (logrank) test p = 2.88e-01

#### ROR1 in ESCA (n=185):

Model: Surv(OS, EVENT) ~ `ROR1` + Age + Gender + Race + Stage

142 patients with 47 dying ( 43 missing obs. )

|            | coef   | HR     | se(coef) | 95%CI_l | 95%CI_u | z      | p     | signif |
|------------|--------|--------|----------|---------|---------|--------|-------|--------|
| ROR1       | -0.349 | 0.706  | 0.157    | 0.518   | 0.961   | -2.216 | 0.027 | *      |
| Age        | 0.019  | 1.019  | 0.014    | 0.991   | 1.048   | 1.315  | 0.188 |        |
| Gendermale | 0.546  | 1.726  | 0.541    | 0.598   | 4.988   | 1.009  | 0.313 |        |
| RaceBlack  | 0.165  | 1.179  | 1.07     | 0.145   | 9.599   | 0.154  | 0.878 |        |
| RaceWhite  | 0.136  | 1.145  | 0.452    | 0.472   | 2.777   | 0.3    | 0.764 |        |
| Stage2     | 0.802  | 2.23   | 0.651    | 0.622   | 7.988   | 1.232  | 0.218 |        |
| Stage3     | 1.531  | 4.624  | 0.664    | 1.259   | 16.978  | 2.307  | 0.021 | *      |
| Stage4     | 2.903  | 18.226 | 0.763    | 4.089   | 81.234  | 3.807  | 0     | ***    |

Rsquare = 0.168 (max possible = 9.3e-01 )

Likelihood ratio test p = 1.02e-03

Wald test p = 4.37e-04

Score (logrank) test p = 2.56e-05

#### ROR1 in GBM (n=153):

Model: Surv(OS, EVENT) ~ `ROR1` + Age + Gender + Race

149 patients with 119 dying ( 4 missing obs. )

|            | coef   | HR    | se(coef) | 95%CI_l | 95%CI_u | z      | p     | signif |
|------------|--------|-------|----------|---------|---------|--------|-------|--------|
| ROR1       | -0.233 | 0.792 | 0.156    | 0.584   | 1.075   | -1.494 | 0.135 |        |
| Age        | 0.032  | 1.032 | 0.008    | 1.016   | 1.049   | 3.932  | 0     | ***    |
| Gendermale | -0.071 | 0.932 | 0.197    | 0.633   | 1.372   | -0.357 | 0.721 |        |
| RaceBlack  | 0.468  | 1.597 | 0.723    | 0.387   | 6.595   | 0.647  | 0.517 |        |
| RaceWhite  | -0.19  | 0.827 | 0.607    | 0.251   | 2.717   | -0.314 | 0.754 |        |

Rsquare = 0.124 (max possible = 9.98e-01 )

Likelihood ratio test p = 1.44e-03

Wald test p = 2.84e-03

Score (logrank) test p = 2.61e-03

#### ROR1 in HNSC (n=522):

Model: Surv(OS, EVENT) ~ `ROR1` + Age + Gender + Race + Stage

431 patients with 184 dying ( 91 missing obs. )

|            | coef   | HR    | se(coef) | 95%CI_l | 95%CI_u | z      | p     | signif |
|------------|--------|-------|----------|---------|---------|--------|-------|--------|
| ROR1       | 0.148  | 1.159 | 0.125    | 0.908   | 1.481   | 1.184  | 0.236 |        |
| Age        | 0.021  | 1.021 | 0.007    | 1.007   | 1.036   | 2.861  | 0.004 | **     |
| Gendermale | -0.271 | 0.763 | 0.166    | 0.55    | 1.057   | -1.629 | 0.103 |        |
| RaceBlack  | 0.069  | 1.072 | 0.559    | 0.358   | 3.209   | 0.124  | 0.901 |        |
| RaceWhite  | -0.323 | 0.724 | 0.513    | 0.265   | 1.978   | -0.63  | 0.529 |        |
| Stage2     | 0.775  | 2.17  | 0.545    | 0.746   | 6.317   | 1.422  | 0.155 |        |
| Stage3     | 0.951  | 2.588 | 0.54     | 0.899   | 7.452   | 1.763  | 0.078 | .      |
| Stage4     | 1.381  | 3.981 | 0.511    | 1.461   | 10.845  | 2.702  | 0.007 | **     |

Rsquare = 0.07 (max possible = 9.9e-01 )

Likelihood ratio test p = 1.26e-04

Wald test p = 3.09e-04

Score (logrank) test p = 2.12e-04

#### ROR1 in HNSC-HPV+ (n=98):

Model: Surv(OS, EVENT) ~ `ROR1` + Age + Gender + Race + Stage

67 patients with 24 dying ( 31 missing obs. )

|            | coef   | HR    | se(coef) | 95%CI_l | 95%CI_u | z      | p     | signif |
|------------|--------|-------|----------|---------|---------|--------|-------|--------|
| ROR1       | 0.243  | 1.275 | 0.307    | 0.698   | 2.329   | 0.791  | 0.429 |        |
| Age        | 0.006  | 1.006 | 0.024    | 0.96    | 1.053   | 0.237  | 0.812 |        |
| Gendermale | -0.061 | 0.941 | 0.524    | 0.337   | 2.627   | -0.117 | 0.907 |        |

|           |        |             |          |   |     |       |       |  |
|-----------|--------|-------------|----------|---|-----|-------|-------|--|
| RaceBlack | 18.255 | 84761125.65 | 12151.84 | 0 | Inf | 0.002 | 0.999 |  |
| RaceWhite | 17.353 | 34377091.71 | 12151.84 | 0 | Inf | 0.001 | 0.999 |  |
| Stage2    | 17.175 | 28767347.72 | 5343.627 | 0 | Inf | 0.003 | 0.997 |  |
| Stage3    | 16.16  | 10428062.73 | 5343.627 | 0 | Inf | 0.003 | 0.998 |  |
| Stage4    | 17.331 | 33646617.36 | 5343.627 | 0 | Inf | 0.003 | 0.997 |  |

Rsquare = 0.081 (max possible = 9.24e-01)

Likelihood ratio test p = 6.83e-01

Wald test p = 9.35e-01

Score (logrank) test p = 8.22e-01

#### ROR1 in HNSC-HPV- (n=422):

Model: Surv(OS, EVENT) ~ `ROR1` + Age + Gender + Race + Stage

364 patients with 160 dying ( 58 missing obs. )

|            | coef   | HR    | se(coef) | 95%CI_l | 95%CI_u | z      | p     | signif |
|------------|--------|-------|----------|---------|---------|--------|-------|--------|
| ROR1       | 0.118  | 1.125 | 0.14     | 0.855   | 1.479   | 0.842  | 0.4   |        |
| Age        | 0.024  | 1.024 | 0.008    | 1.008   | 1.041   | 3.009  | 0.003 | **     |
| Gendermale | -0.294 | 0.746 | 0.176    | 0.528   | 1.053   | -1.665 | 0.096 | .      |
| RaceBlack  | -0.063 | 0.939 | 0.567    | 0.309   | 2.851   | -0.112 | 0.911 |        |
| RaceWhite  | -0.445 | 0.641 | 0.516    | 0.233   | 1.762   | -0.862 | 0.389 |        |
| Stage2     | 0.55   | 1.734 | 0.555    | 0.584   | 5.148   | 0.991  | 0.322 |        |
| Stage3     | 0.873  | 2.394 | 0.544    | 0.824   | 6.956   | 1.604  | 0.109 |        |
| Stage4     | 1.29   | 3.634 | 0.514    | 1.328   | 9.944   | 2.512  | 0.012 | *      |

Rsquare = 0.081 (max possible = 9.89e-01)

Likelihood ratio test p = 1.57e-04

Wald test p = 3.74e-04

Score (logrank) test p = 2.72e-04

#### ROR1 in KICH (n=66):

Model: Surv(OS, EVENT) ~ `ROR1` + Age + Gender + Race + Stage

63 patients with 9 dying ( 3 missing obs. )

|            | coef    | HR       | se(coef) | 95%CI_l     | 95%CI_u  | z      | p     | signif |
|------------|---------|----------|----------|-------------|----------|--------|-------|--------|
| ROR1       | 0.127   | 1.14E+00 | 0.51     | 0.418       | 3.08E+00 | 0.249  | 0.804 |        |
| Age        | 0.072   | 1.07E+00 | 0.029    | 1.016       | 1.14E+00 | 2.499  | 0.012 | *      |
| Gendermale | -0.885  | 4.13E-01 | 0.728    | 0.099       | 1.72E+00 | -1.215 | 0.224 |        |
| RaceBlack  | -17.003 | 0.00E+00 | 6326.393 | 0           | Inf      | -0.003 | 0.998 |        |
| RaceWhite  | -1.837  | 1.59E-01 | 1.161    | 0.016       | 1.55E+00 | -1.582 | 0.114 |        |
| Stage2     | 16.083  | 9.65E+06 | 0.849    | 1826607.177 | 5.10E+07 | 18.934 | 0     | ****   |
| Stage3     | 17.145  | 2.79E+07 | 0.776    | 6102805.105 | 1.28E+08 | 22.097 | 0     | ****   |
| Stage4     | 19.591  | 3.22E+08 | 0.899    | 55280881.16 | 1.88E+09 | 21.78  | 0     | ****   |

Rsquare = 0.345 (max possible = 6.71e-01)

Likelihood ratio test p = 7.96e-04

Wald test p = 3.7e-282

Score (logrank) test p = 3.63e-09

#### ROR1 in KIRC (n=533):

Model: Surv(OS, EVENT) ~ `ROR1` + Age + Gender + Race + Stage

519 patients with 170 dying ( 14 missing obs. )

|            | coef   | HR    | se(coef) | 95%CI_l | 95%CI_u | z      | p     | signif |
|------------|--------|-------|----------|---------|---------|--------|-------|--------|
| ROR1       | -0.447 | 0.64  | 0.116    | 0.509   | 0.804   | -3.836 | 0     | ***    |
| Age        | 0.031  | 1.032 | 0.007    | 1.017   | 1.047   | 4.206  | 0     | ***    |
| Gendermale | -0.144 | 0.866 | 0.165    | 0.627   | 1.197   | -0.87  | 0.384 |        |
| RaceBlack  | 0.372  | 1.451 | 1.053    | 0.184   | 11.428  | 0.353  | 0.724 |        |
| RaceWhite  | 0.551  | 1.735 | 1.013    | 0.238   | 12.642  | 0.544  | 0.587 |        |
| Stage2     | 0.232  | 1.262 | 0.321    | 0.672   | 2.368   | 0.723  | 0.47  |        |
| Stage3     | 0.91   | 2.484 | 0.213    | 1.635   | 3.773   | 4.265  | 0     | ***    |
| Stage4     | 1.884  | 6.579 | 0.201    | 4.439   | 9.749   | 9.386  | 0     | ***    |

Rsquare = 0.236 (max possible = 9.75e-01)

Likelihood ratio test p = 2.78e-26

Wald test p = 5.31e-26

Score (logrank) test p = 4.89e-32

#### ROR1 in KIRP (n=290):

Model: Surv(OS, EVENT) ~ `ROR1` + Age + Gender + Race + Stage

243 patients with 38 dying ( 47 missing obs. )

|  | coef | HR | se(coef) | 95%CI_l | 95%CI_u | z | p | signif |
|--|------|----|----------|---------|---------|---|---|--------|
|--|------|----|----------|---------|---------|---|---|--------|

|            |        |       |       |       |        |        |       |     |
|------------|--------|-------|-------|-------|--------|--------|-------|-----|
| ROR1       | 0.172  | 1.187 | 0.181 | 0.832 | 1.694  | 0.948  | 0.343 |     |
| Age        | 0.014  | 1.014 | 0.016 | 0.983 | 1.045  | 0.871  | 0.384 |     |
| Gendermale | -0.253 | 0.777 | 0.364 | 0.38  | 1.586  | -0.693 | 0.488 |     |
| RaceBlack  | -2.08  | 0.125 | 1.158 | 0.013 | 1.209  | -1.796 | 0.073 | .   |
| RaceWhite  | -2.299 | 0.1   | 1.149 | 0.011 | 0.955  | -2     | 0.045 | *   |
| Stage2     | 0.001  | 1.001 | 0.769 | 0.222 | 4.517  | 0.001  | 0.999 |     |
| Stage3     | 1.428  | 4.17  | 0.389 | 1.946 | 8.939  | 3.671  | 0     | *** |
| Stage4     | 2.703  | 14.92 | 0.464 | 6.014 | 37.014 | 5.83   | 0     | *** |

Rsquare = 0.15 (max possible = 7.65e-01 )

Likelihood ratio test p = 4.22e-06

Wald test p = 5.48e-07

Score (logrank) test p = 3.47e-11

#### ROR1 in LAML (n=173):

Model: Surv(OS, EVENT) ~ `ROR1` + Age + Gender + Race

149 patients with 93 dying ( 24 missing obs. )

|            | coef   | HR    | se(coef) | 95%CI_l | 95%CI_u | z      | p     | signif |
|------------|--------|-------|----------|---------|---------|--------|-------|--------|
| ROR1       | 0.536  | 1.709 | 0.543    | 0.59    | 4.949   | 0.987  | 0.323 |        |
| Age        | 0.036  | 1.037 | 0.008    | 1.02    | 1.054   | 4.357  | 0     | ***    |
| Gendermale | -0.115 | 0.891 | 0.213    | 0.587   | 1.352   | -0.542 | 0.588 |        |
| RaceBlack  | -0.418 | 0.659 | 1.108    | 0.075   | 5.781   | -0.377 | 0.706 |        |
| RaceWhite  | -0.785 | 0.456 | 1.021    | 0.062   | 3.374   | -0.769 | 0.442 |        |

Rsquare = 0.161 (max possible = 9.96e-01 )

Likelihood ratio test p = 8.5e-05

Wald test p = 2.12e-04

Score (logrank) test p = 1.28e-04

#### ROR1 in LGG (n=516):

Model: Surv(OS, EVENT) ~ `ROR1` + Age + Gender + Race

500 patients with 124 dying ( 16 missing obs. )

|            | coef   | HR          | se(coef) | 95%CI_l | 95%CI_u | z     | p     | signif |
|------------|--------|-------------|----------|---------|---------|-------|-------|--------|
| ROR1       | 0.933  | 2.543       | 0.133    | 1.961   | 3.297   | 7.042 | 0     | ***    |
| Age        | 0.059  | 1.061       | 0.007    | 1.046   | 1.076   | 8.146 | 0     | ***    |
| Gendermale | 0.241  | 1.273       | 0.191    | 0.876   | 1.85    | 1.266 | 0.206 |        |
| RaceBlack  | 15.336 | 4573467.195 | 2533.119 | 0       | Inf     | 0.006 | 0.995 |        |
| RaceWhite  | 15.778 | 7117335.446 | 2533.119 | 0       | Inf     | 0.006 | 0.995 |        |

Rsquare = 0.188 (max possible = 9.16e-01 )

Likelihood ratio test p = 6.95e-21

Wald test p = 1.24e-21

Score (logrank) test p = 2.4e-25

#### ROR1 in LIHC (n=371):

Model: Surv(OS, EVENT) ~ `ROR1` + Age + Gender + Race + Stage

330 patients with 112 dying ( 41 missing obs. )

|            | coef   | HR    | se(coef) | 95%CI_l | 95%CI_u | z      | p     | signif |
|------------|--------|-------|----------|---------|---------|--------|-------|--------|
| ROR1       | 0.295  | 1.343 | 0.158    | 0.985   | 1.831   | 1.862  | 0.063 | .      |
| Age        | 0.012  | 1.012 | 0.008    | 0.997   | 1.028   | 1.557  | 0.119 |        |
| Gendermale | -0.174 | 0.84  | 0.214    | 0.552   | 1.279   | -0.812 | 0.417 |        |
| RaceBlack  | 0.668  | 1.95  | 0.481    | 0.76    | 5.001   | 1.39   | 0.165 |        |
| RaceWhite  | -0.103 | 0.902 | 0.224    | 0.582   | 1.399   | -0.461 | 0.645 |        |
| Stage2     | 0.263  | 1.3   | 0.257    | 0.786   | 2.151   | 1.023  | 0.306 |        |
| Stage3     | 0.974  | 2.648 | 0.224    | 1.706   | 4.109   | 4.342  | 0     | ***    |
| Stage4     | 1.734  | 5.664 | 0.616    | 1.693   | 18.951  | 2.814  | 0.005 | **     |

Rsquare = 0.087 (max possible = 9.67e-01 )

Likelihood ratio test p = 2.07e-04

Wald test p = 9.67e-05

Score (logrank) test p = 3.12e-05

#### ROR1 in LUAD (n=515):

Model: Surv(OS, EVENT) ~ `ROR1` + Age + Gender + Race + Stage

439 patients with 160 dying ( 76 missing obs. )

|            | coef   | HR    | se(coef) | 95%CI_l | 95%CI_u | z      | p     | signif |
|------------|--------|-------|----------|---------|---------|--------|-------|--------|
| ROR1       | -0.029 | 0.972 | 0.093    | 0.811   | 1.165   | -0.311 | 0.756 |        |
| Age        | 0.005  | 1.005 | 0.009    | 0.988   | 1.022   | 0.594  | 0.552 |        |
| Gendermale | 0.041  | 1.042 | 0.163    | 0.757   | 1.434   | 0.254  | 0.8   |        |

|           |       |       |       |       |        |       |       |     |
|-----------|-------|-------|-------|-------|--------|-------|-------|-----|
| RaceBlack | 0.936 | 2.55  | 1.036 | 0.335 | 19.429 | 0.904 | 0.366 |     |
| RaceWhite | 1.162 | 3.196 | 1.007 | 0.444 | 23.017 | 1.154 | 0.249 |     |
| Stage2    | 0.85  | 2.34  | 0.195 | 1.595 | 3.432  | 4.349 | 0     | *** |
| Stage3    | 1.074 | 2.927 | 0.209 | 1.943 | 4.41   | 5.136 | 0     | *** |
| Stage4    | 1.149 | 3.154 | 0.317 | 1.695 | 5.868  | 3.626 | 0     | *** |

Rsquare = 0.089 (max possible = 9.77e-01 )

Likelihood ratio test p = 2.16e-06

Wald test p = 3.87e-06

Score (logrank) test p = 9.72e-07

#### ROR1 in LUSC (n=501):

Model: Surv(OS, EVENT) ~ `ROR1` + Age + Gender + Race + Stage

382 patients with 168 dying ( 119 missing obs. )

|            | coef   | HR    | se(coef) | 95%CI_l | 95%CI_u | z      | p     | signif |
|------------|--------|-------|----------|---------|---------|--------|-------|--------|
| ROR1       | 0.171  | 1.186 | 0.105    | 0.966   | 1.458   | 1.627  | 0.104 |        |
| Age        | 0.015  | 1.016 | 0.009    | 0.998   | 1.034   | 1.697  | 0.09  | .      |
| Gendermale | 0.472  | 1.604 | 0.191    | 1.104   | 2.33    | 2.477  | 0.013 | *      |
| RaceBlack  | 0.218  | 1.243 | 0.619    | 0.37    | 4.179   | 0.352  | 0.725 |        |
| RaceWhite  | -0.332 | 0.718 | 0.571    | 0.235   | 2.195   | -0.582 | 0.561 |        |
| Stage2     | 0.236  | 1.266 | 0.182    | 0.885   | 1.81    | 1.291  | 0.197 |        |
| Stage3     | 0.606  | 1.832 | 0.212    | 1.209   | 2.778   | 2.853  | 0.004 | **     |
| Stage4     | 1.199  | 3.318 | 0.664    | 0.903   | 12.187  | 1.807  | 0.071 | .      |

Rsquare = 0.058 (max possible = 9.88e-01 )

Likelihood ratio test p = 3.36e-03

Wald test p = 1.89e-03

Score (logrank) test p = 1.34e-03

#### ROR1 in MESO (n=87):

Model: Surv(OS, EVENT) ~ `ROR1` + Age + Gender + Race + Stage

86 patients with 73 dying ( 1 missing obs. )

|            | coef   | HR    | se(coef) | 95%CI_l | 95%CI_u | z      | p     | signif |
|------------|--------|-------|----------|---------|---------|--------|-------|--------|
| ROR1       | 0.235  | 1.265 | 0.119    | 1.002   | 1.596   | 1.981  | 0.048 | *      |
| Age        | 0.018  | 1.019 | 0.016    | 0.988   | 1.05    | 1.178  | 0.239 |        |
| Gendermale | -0.263 | 0.769 | 0.335    | 0.399   | 1.483   | -0.784 | 0.433 |        |
| RaceBlack  | -0.791 | 0.453 | 1.598    | 0.02    | 10.39   | -0.495 | 0.62  |        |
| RaceWhite  | -1.059 | 0.347 | 1.074    | 0.042   | 2.845   | -0.986 | 0.324 |        |
| Stage2     | -0.226 | 0.798 | 0.458    | 0.325   | 1.959   | -0.492 | 0.622 |        |
| Stage3     | -0.04  | 0.961 | 0.409    | 0.431   | 2.143   | -0.097 | 0.922 |        |
| Stage4     | -0.228 | 0.796 | 0.459    | 0.324   | 1.957   | -0.496 | 0.62  |        |

Rsquare = 0.084 (max possible = 9.98e-01 )

Likelihood ratio test p = 4.78e-01

Wald test p = 4.93e-01

Score (logrank) test p = 4.8e-01

#### ROR1 in OV (n=303):

Model: Surv(OS, EVENT) ~ `ROR1` + Age + Race

289 patients with 178 dying ( 14 missing obs. )

|           | coef   | HR    | se(coef) | 95%CI_l | 95%CI_u | z      | p     | signif |
|-----------|--------|-------|----------|---------|---------|--------|-------|--------|
| ROR1      | 0.011  | 1.011 | 0.081    | 0.862   | 1.186   | 0.137  | 0.891 |        |
| Age       | 0.031  | 1.032 | 0.008    | 1.017   | 1.047   | 4.147  | 0     | ***    |
| RaceBlack | 0.112  | 1.118 | 0.564    | 0.37    | 3.381   | 0.198  | 0.843 |        |
| RaceWhite | -0.068 | 0.934 | 0.515    | 0.34    | 2.564   | -0.133 | 0.894 |        |

Rsquare = 0.059 (max possible = 9.97e-01 )

Likelihood ratio test p = 1.5e-03

Wald test p = 1.34e-03

Score (logrank) test p = 1.2e-03

#### ROR1 in PAAD (n=179):

Model: Surv(OS, EVENT) ~ `ROR1` + Age + Gender + Race + Stage

171 patients with 90 dying ( 8 missing obs. )

|            | coef   | HR    | se(coef) | 95%CI_l | 95%CI_u | z      | p     | signif |
|------------|--------|-------|----------|---------|---------|--------|-------|--------|
| ROR1       | 0.213  | 1.238 | 0.142    | 0.938   | 1.634   | 1.505  | 0.132 |        |
| Age        | 0.023  | 1.023 | 0.011    | 1.001   | 1.046   | 2.089  | 0.037 | *      |
| Gendermale | -0.246 | 0.782 | 0.215    | 0.514   | 1.191   | -1.145 | 0.252 |        |
| RaceBlack  | -0.022 | 0.978 | 0.701    | 0.248   | 3.865   | -0.032 | 0.975 |        |

|           |       |       |       |       |       |       |       |   |
|-----------|-------|-------|-------|-------|-------|-------|-------|---|
| RaceWhite | 0.269 | 1.308 | 0.479 | 0.511 | 3.347 | 0.56  | 0.575 |   |
| Stage2    | 0.846 | 2.33  | 0.439 | 0.986 | 5.505 | 1.928 | 0.054 | . |
| Stage3    | 0.151 | 1.163 | 1.088 | 0.138 | 9.806 | 0.139 | 0.889 |   |
| Stage4    | 0.286 | 1.331 | 0.834 | 0.259 | 6.825 | 0.342 | 0.732 |   |

Rsquare = 0.087 (max possible = 9.9e-01 )

Likelihood ratio test p = 5.05e-02

Wald test p = 8.26e-02

Score (logrank) test p = 6.92e-02

#### ROR1 in PCPG (n=181):

Model: Surv(OS, EVENT) ~ `ROR1` + Age + Gender + Race

176 patients with 7 dying ( 5 missing obs. )

|            | coef   | HR          | se(coef) | 95%CI_l | 95%CI_u | z     | p     | signif |
|------------|--------|-------------|----------|---------|---------|-------|-------|--------|
| ROR1       | 0.294  | 1.342       | 0.957    | 0.206   | 8.763   | 0.308 | 0.758 |        |
| Age        | 0.031  | 1.031       | 0.025    | 0.982   | 1.083   | 1.236 | 0.216 |        |
| Gendermale | 1.552  | 4.719       | 0.954    | 0.727   | 30.627  | 1.626 | 0.104 |        |
| RaceBlack  | 0.128  | 1.137       | 21211.75 | 0       | Inf     | 0     | 1     | <NA>   |
| RaceWhite  | 17.777 | 52532118.43 | 17295.11 | 0       | Inf     | 0.001 | 0.999 |        |

Rsquare = 0.032 (max possible = 2.95e-01 )

Likelihood ratio test p = 3.38e-01

Wald test p = 7.28e-01

Score (logrank) test p = 4.26e-01

#### ROR1 in PRAD (n=498):

Model: Surv(OS, EVENT) ~ `ROR1` + Age + Race

481 patients with 10 dying ( 17 missing obs. )

|           | coef   | HR          | se(coef) | 95%CI_l | 95%CI_u | z      | p     | signif |
|-----------|--------|-------------|----------|---------|---------|--------|-------|--------|
| ROR1      | -0.496 | 0.609       | 0.463    | 0.246   | 1.508   | -1.073 | 0.283 |        |
| Age       | 0.044  | 1.045       | 0.052    | 0.944   | 1.157   | 0.844  | 0.399 |        |
| RaceBlack | 15.809 | 7343392.664 | 6678.002 | 0       | Inf     | 0.002  | 0.998 |        |
| RaceWhite | 16.195 | 10797687.38 | 6678.002 | 0       | Inf     | 0.002  | 0.998 |        |

Rsquare = 0.006 (max possible = 1.72e-01 )

Likelihood ratio test p = 6.01e-01

Wald test p = 7.1e-01

Score (logrank) test p = 6.64e-01

#### ROR1 in READ (n=166):

Model: Surv(OS, EVENT) ~ `ROR1` + Age + Gender + Race + Stage

78 patients with 14 dying ( 88 missing obs. )

|            | coef   | HR         | se(coef) | 95%CI_l | 95%CI_u | z      | p     | signif |
|------------|--------|------------|----------|---------|---------|--------|-------|--------|
| ROR1       | 1.212  | 3.361      | 0.664    | 0.916   | 12.339  | 1.827  | 0.068 | .      |
| Age        | 0.141  | 1.151      | 0.053    | 1.038   | 1.277   | 2.663  | 0.008 | **     |
| Gendermale | -0.009 | 0.991      | 0.701    | 0.251   | 3.919   | -0.013 | 0.99  |        |
| RaceBlack  | 12.85  | 380660.485 | 6979.641 | 0       | Inf     | 0.002  | 0.999 |        |
| RaceWhite  | 11.073 | 64436.966  | 6979.641 | 0       | Inf     | 0.002  | 0.999 |        |
| Stage2     | -1.765 | 0.171      | 1.261    | 0.014   | 2.028   | -1.399 | 0.162 |        |
| Stage3     | -0.215 | 0.806      | 0.913    | 0.135   | 4.828   | -0.236 | 0.814 |        |
| Stage4     | -0.462 | 0.63       | 1.014    | 0.086   | 4.597   | -0.455 | 0.649 |        |

Rsquare = 0.236 (max possible = 7.16e-01 )

Likelihood ratio test p = 7.24e-03

Wald test p = 1e-01

Score (logrank) test p = 1.66e-02

#### ROR1 in SARC (n=260):

Model: Surv(OS, EVENT) ~ `ROR1` + Age + Gender + Race

248 patients with 94 dying ( 12 missing obs. )

|            | coef   | HR    | se(coef) | 95%CI_l | 95%CI_u | z      | p     | signif |
|------------|--------|-------|----------|---------|---------|--------|-------|--------|
| ROR1       | 0.118  | 1.125 | 0.083    | 0.957   | 1.323   | 1.423  | 0.155 |        |
| Age        | 0.021  | 1.021 | 0.008    | 1.005   | 1.038   | 2.602  | 0.009 | **     |
| Gendermale | -0.115 | 0.892 | 0.217    | 0.583   | 1.363   | -0.529 | 0.597 |        |
| RaceBlack  | -0.019 | 0.981 | 1.074    | 0.119   | 8.059   | -0.018 | 0.986 |        |
| RaceWhite  | -0.368 | 0.692 | 1.019    | 0.094   | 5.101   | -0.361 | 0.718 |        |

Rsquare = 0.04 (max possible = 9.74e-01 )

Likelihood ratio test p = 6.86e-02

Wald test p = 8.44e-02



Score (logrank) test p = 8.46e-02

**ROR1 in SKCM (n=471):**

Model: Surv(OS, EVENT) ~ `ROR1` + Age + Gender + Race + Stage  
 400 patients with 191 dying ( 71 missing obs. )

|            | coef   | HR    | se(coef) | 95%CI_l | 95%CI_u | z      | p     | signif |
|------------|--------|-------|----------|---------|---------|--------|-------|--------|
| ROR1       | -0.01  | 0.99  | 0.085    | 0.838   | 1.169   | -0.123 | 0.902 |        |
| Age        | 0.02   | 1.02  | 0.005    | 1.01    | 1.03    | 3.882  | 0     | ***    |
| Gendermale | -0.02  | 0.981 | 0.156    | 0.722   | 1.332   | -0.125 | 0.901 |        |
| RaceWhite  | -1.359 | 0.257 | 0.401    | 0.117   | 0.564   | -3.387 | 0.001 | **     |
| Stage2     | 0.26   | 1.297 | 0.216    | 0.849   | 1.983   | 1.204  | 0.229 |        |
| Stage3     | 0.588  | 1.8   | 0.202    | 1.212   | 2.674   | 2.914  | 0.004 | **     |
| Stage4     | 1.235  | 3.437 | 0.349    | 1.735   | 6.808   | 3.54   | 0     | ***    |

Rsquare = 0.101 (max possible = 9.92e-01 )

Likelihood ratio test p = 4.06e-07

Wald test p = 1.05e-07

Score (logrank) test p = 1.78e-08

**ROR1 in SKCM-Primary (n=103):**

Model: Surv(OS, EVENT) ~ `ROR1` + Age + Gender + Race + Stage  
 94 patients with 26 dying ( 9 missing obs. )

|            | coef   | HR       | se(coef) | 95%CI_l | 95%CI_u | z      | p     | signif |
|------------|--------|----------|----------|---------|---------|--------|-------|--------|
| ROR1       | 0.009  | 1.01E+00 | 0.267    | 0.598   | 1.701   | 0.032  | 0.974 |        |
| Age        | 0.013  | 1.01E+00 | 0.016    | 0.982   | 1.045   | 0.794  | 0.427 |        |
| Gendermale | 0.235  | 1.27E+00 | 0.43     | 0.545   | 2.937   | 0.548  | 0.584 |        |
| RaceWhite  | -1.293 | 2.74E-01 | 0.615    | 0.082   | 0.916   | -2.102 | 0.036 | *      |
| Stage2     | 17.475 | 3.88E+07 | 6203.221 | 0       | Inf     | 0.003  | 0.998 |        |
| Stage3     | 17.967 | 6.35E+07 | 6203.221 | 0       | Inf     | 0.003  | 0.998 |        |
| Stage4     | 20.127 | 5.51E+08 | 6203.221 | 0       | Inf     | 0.003  | 0.997 |        |

Rsquare = 0.146 (max possible = 8.69e-01 )

Likelihood ratio test p = 3.86e-02

Wald test p = 3.47e-02

Score (logrank) test p = 2.44e-03

**ROR1 in SKCM-Metastasis (n=368):**

Model: Surv(OS, EVENT) ~ `ROR1` + Age + Gender + Race + Stage  
 306 patients with 165 dying ( 62 missing obs. )

|            | coef  | HR    | se(coef) | 95%CI_l | 95%CI_u | z      | p     | signif |
|------------|-------|-------|----------|---------|---------|--------|-------|--------|
| ROR1       | 0.018 | 1.018 | 0.09     | 0.853   | 1.215   | 0.196  | 0.845 |        |
| Age        | 0.022 | 1.023 | 0.006    | 1.011   | 1.034   | 4.017  | 0     | ***    |
| Gendermale | -0.03 | 0.97  | 0.171    | 0.694   | 1.355   | -0.178 | 0.859 |        |
| RaceWhite  | -1.16 | 0.313 | 0.599    | 0.097   | 1.013   | -1.938 | 0.053 | .      |
| Stage2     | 0.144 | 1.155 | 0.227    | 0.739   | 1.803   | 0.632  | 0.527 |        |
| Stage3     | 0.54  | 1.716 | 0.206    | 1.146   | 2.57    | 2.622  | 0.009 | **     |
| Stage4     | 0.971 | 2.641 | 0.396    | 1.215   | 5.738   | 2.453  | 0.014 | *      |

Rsquare = 0.103 (max possible = 9.95e-01 )

Likelihood ratio test p = 2.48e-05

Wald test p = 1.97e-05

Score (logrank) test p = 9.79e-06

**ROR1 in STAD (n=415):**

Model: Surv(OS, EVENT) ~ `ROR1` + Age + Gender + Race + Stage  
 323 patients with 125 dying ( 92 missing obs. )

|            | coef   | HR    | se(coef) | 95%CI_l | 95%CI_u | z     | p     | signif |
|------------|--------|-------|----------|---------|---------|-------|-------|--------|
| ROR1       | 0.233  | 1.263 | 0.088    | 1.063   | 1.5     | 2.661 | 0.008 | **     |
| Age        | 0.033  | 1.034 | 0.01     | 1.014   | 1.054   | 3.403 | 0.001 | **     |
| Gendermale | 0.108  | 1.114 | 0.192    | 0.765   | 1.622   | 0.563 | 0.574 |        |
| RaceBlack  | 0.226  | 1.254 | 0.441    | 0.528   | 2.974   | 0.513 | 0.608 |        |
| RaceWhite  | -0.033 | 0.968 | 0.236    | 0.609   | 1.537   | -0.14 | 0.889 |        |
| Stage2     | 0.594  | 1.811 | 0.383    | 0.855   | 3.835   | 1.551 | 0.121 |        |
| Stage3     | 1.025  | 2.788 | 0.359    | 1.381   | 5.63    | 2.859 | 0.004 | **     |
| Stage4     | 1.838  | 6.284 | 0.486    | 2.426   | 16.273  | 3.786 | 0     | ***    |

Rsquare = 0.085 (max possible = 9.81e-01 )

Likelihood ratio test p = 3.66e-04

Wald test p = 4.94e-04

Score (logrank) test p = 4e-04

**ROR1 in TGCT (n=150):**

Model: Surv(OS, EVENT) ~ `ROR1` + Age + Race + Stage

77 patients with 2 dying ( 73 missing obs. )

|           | coef    | HR        | se(coef) | 95%CI_l | 95%CI_u | z      | p     | signif |
|-----------|---------|-----------|----------|---------|---------|--------|-------|--------|
| ROR1      | -7.35   | 0.001     | 12310.66 | 0       | Inf     | -0.001 | 1     | <NA>   |
| Age       | -2.392  | 0.091     | 1734.582 | 0       | Inf     | -0.001 | 0.999 |        |
| RaceBlack | 5.344   | 209.278   | 3804039  | 0       | Inf     | 0      | 1     | <NA>   |
| RaceWhite | -38.366 | 0         | 3811962  | 0       | Inf     | 0      | 1     | <NA>   |
| Stage2    | 1.531   | 4.624     | 33496.55 | 0       | Inf     | 0      | 1     | <NA>   |
| Stage3    | 11.142  | 69011.398 | 103956.3 | 0       | Inf     | 0      | 1     | <NA>   |

Rsquare = 0.137 (max possible = 1.37e-01 )

Likelihood ratio test p = 7.73e-02

Wald test p = 1e+00

Score (logrank) test p = 8.82e-03

**ROR1 in THCA (n=509):**

Model: Surv(OS, EVENT) ~ `ROR1` + Age + Gender + Race + Stage

411 patients with 16 dying ( 98 missing obs. )

|            | coef   | HR       | se(coef) | 95%CI_l | 95%CI_u | z      | p     | signif |
|------------|--------|----------|----------|---------|---------|--------|-------|--------|
| ROR1       | 0.381  | 1.46E+00 | 0.463    | 0.59    | 3.628   | 0.821  | 0.411 |        |
| Age        | 0.153  | 1.17E+00 | 0.03     | 1.099   | 1.235   | 5.137  | 0     | ***    |
| Gendermale | 0.442  | 1.56E+00 | 0.584    | 0.495   | 4.89    | 0.756  | 0.45  |        |
| RaceBlack  | 18.545 | 1.13E+08 | 8109.587 | 0       | Inf     | 0.002  | 0.998 |        |
| RaceWhite  | 18.17  | 7.78E+07 | 8109.587 | 0       | Inf     | 0.002  | 0.998 |        |
| Stage2     | 0.322  | 1.38E+00 | 1.063    | 0.172   | 11.078  | 0.303  | 0.762 |        |
| Stage3     | -0.115 | 8.92E-01 | 0.849    | 0.169   | 4.709   | -0.135 | 0.893 |        |
| Stage4     | 0.715  | 2.05E+00 | 0.888    | 0.359   | 11.656  | 0.805  | 0.421 |        |

Rsquare = 0.137 (max possible = 3.38e-01 )

Likelihood ratio test p = 3.53e-10

Wald test p = 2.59e-04

Score (logrank) test p = 1.53e-10

**ROR1 in THYM (n=120):**

Model: Surv(OS, EVENT) ~ `ROR1` + Age + Gender + Race

117 patients with 9 dying ( 3 missing obs. )

|            | coef    | HR    | se(coef) | 95%CI_l | 95%CI_u | z      | p     | signif |
|------------|---------|-------|----------|---------|---------|--------|-------|--------|
| ROR1       | -0.316  | 0.729 | 0.464    | 0.293   | 1.813   | -0.679 | 0.497 |        |
| Age        | 0.064   | 1.066 | 0.033    | 1       | 1.137   | 1.952  | 0.051 | .      |
| Gendermale | -0.295  | 0.745 | 0.718    | 0.182   | 3.044   | -0.41  | 0.682 |        |
| RaceBlack  | -16.815 | 0     | 9219.931 | 0       | Inf     | -0.002 | 0.999 |        |
| RaceWhite  | 0.489   | 1.631 | 1.1      | 0.189   | 14.088  | 0.444  | 0.657 |        |

Rsquare = 0.048 (max possible = 4.44e-01 )

Likelihood ratio test p = 3.25e-01

Wald test p = 4.83e-01

Score (logrank) test p = 3.98e-01

**ROR1 in UCEC (n=545):**

Model: Surv(OS, EVENT) ~ `ROR1` + Age + Race

497 patients with 85 dying ( 48 missing obs. )

|           | coef   | HR    | se(coef) | 95%CI_l | 95%CI_u | z     | p     | signif |
|-----------|--------|-------|----------|---------|---------|-------|-------|--------|
| ROR1      | -0.145 | 0.865 | 0.148    | 0.647   | 1.156   | -0.98 | 0.327 |        |
| Age       | 0.041  | 1.042 | 0.011    | 1.019   | 1.066   | 3.605 | 0     | ***    |
| RaceBlack | 0.823  | 2.278 | 0.75     | 0.524   | 9.912   | 1.098 | 0.272 |        |
| RaceWhite | 0.726  | 2.067 | 0.726    | 0.498   | 8.57    | 1     | 0.317 |        |

Rsquare = 0.037 (max possible = 8.48e-01 )

Likelihood ratio test p = 9.47e-04

Wald test p = 1.82e-03

Score (logrank) test p = 1.64e-03

**ROR1 in UCS (n=57):**

Model: Surv(OS, EVENT) ~ `ROR1` + Age + Race

54 patients with 34 dying ( 3 missing obs. )

|  | coef | HR | se(coef) | 95%CI_l | 95%CI_u | z | p | signif |
|--|------|----|----------|---------|---------|---|---|--------|
|--|------|----|----------|---------|---------|---|---|--------|

|           |        |             |          |       |       |        |       |   |
|-----------|--------|-------------|----------|-------|-------|--------|-------|---|
| ROR1      | -0.324 | 0.723       | 0.215    | 0.475 | 1.102 | -1.509 | 0.131 |   |
| Age       | 0.062  | 1.064       | 0.025    | 1.013 | 1.117 | 2.47   | 0.014 | * |
| RaceBlack | 16.887 | 21567091.11 | 4076.792 | 0     | Inf   | 0.004  | 0.997 |   |
| RaceWhite | 17.189 | 29171120.97 | 4076.792 | 0     | Inf   | 0.004  | 0.997 |   |

Rsquare = 0.153 (max possible = 9.84e-01 )

Likelihood ratio test p = 6.22e-02

Wald test p = 1.23e-01

Score (logrank) test p = 8.24e-02

**ROR1 in UVM (n=80):**

Model: Surv(OS, EVENT) ~ `ROR1` + Age + Gender + Stage

79 patients with 22 dying ( 1 missing obs. )

|            | coef   | HR     | se(coef) | 95%CI l | 95%CI u | z      | p     | signif |
|------------|--------|--------|----------|---------|---------|--------|-------|--------|
| ROR1       | 1.516  | 4.553  | 1.085    | 0.543   | 38.183  | 1.397  | 0.162 |        |
| Age        | 0.032  | 1.033  | 0.019    | 0.995   | 1.072   | 1.7    | 0.089 | .      |
| Gendermale | 0.365  | 1.44   | 0.48     | 0.562   | 3.689   | 0.76   | 0.447 |        |
| Stage3     | -0.083 | 0.92   | 0.507    | 0.341   | 2.486   | -0.164 | 0.87  |        |
| Stage4     | 3.792  | 44.365 | 1.225    | 4.021   | 489.522 | 3.096  | 0.002 | **     |

Rsquare = 0.238 (max possible = 8.67e-01 )

Likelihood ratio test p = 6.55e-04

Wald test p = 1.29e-03

Score (logrank) test p = 3.58e-10
